# Supplementary material for: Long-term pediatric hematological morbidity of the early-term newborn
Source: Springer Nature journal article supplement (doi:10.1007/s00431-018-3223-x), 2018-08-07
Supplement: MOESM2 [file 16016906]

**Supplementary Table 2– ICD Codes for maternal hematological morbidity**

| **Groups** | **Diag. Code** | **Diagnosis Description** |
| --- | --- | --- |
| **Hereditary anemias** | 2822 | ANEMIAS, DISORDERS OF GLUTATHIONE METABOLISM (G-6-P-D-) |
| 2822 1 | G-6-PD DEFICIENCY |
| 28249 | OTHER THALASSEMIA |
| 282490 | THALASSEMIA MAJOR |
| 2824 | THALASSEMIAS |
| **Coagulation disorders** | 2899 | UNSPECIFIED DISEASES OF BLOOD AND BLOOD-FORMING ORGANS |
| 2865 | HEMORRHAGIC DISORDER DUE TO CIRCULATING ANTICOAGULANTS |
| 2863 | CONGENITAL DEFICIENCY OF OTHER CLOTTING FACTORS |
| 2862 | CONGENITAL FACTOR XI DEFICIENCY |
| 2895 | OTHER DISEASE OF SPLEEN |
| 28731 | IMMUNE THROMBOCYTOPENIC PURPURA |
| 2869 | OTHER AND UNSPECIFIED COAGULATION DEFECTS |
| 2898 | OTHER SPECIFIED DISEASES OF BLOOD AND BLOOD-FORMING ORGANS |
| 2873 | PRIMARY THROMBOCYTOPENIA |
| 2875 | THROMBOCYTOPENIA, UNSPECIFIED |
| 64931 | COAGULATION DEFECTS COMPLICATING PREGNANCY, WITH DELIVERY |
